# Supplementary material for: Genome-wide cancer-specific chromatin accessibility patterns derived from archival processed xenograft tumors
Source: PubMed Central journal article supplement — Genome Res. 2021 Dec;31(12):2327–39. doi: 10.1101/gr.275219.121 (PMC8647830; doi:10.1101/gr.275219.121), 2021-12
Supplement: supp_gr.275219.121_Supplemental_Fig_S1.pdf [file supp_gr.275219.121_Supplemental_Fig_S1.pdf]

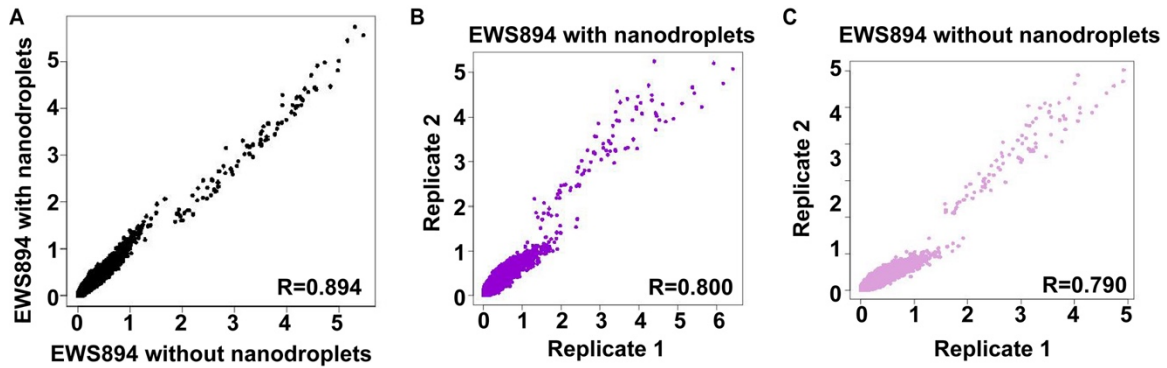

**Fig. S1. Correlation of signal between EWS894 cell FAIRE with and without nanodroplets.** (A) Correlation of genome-wide FAIRE signal, in 300 bp bins, between EWS894 FAIRE done with and without nanodroplets (shown in black). Mean of signal for each bin was found across replicates within each protocol treatment group. Correlation coefficient,  $R$ , depicted. (B) Correlation of genome-wide FAIRE signal, in 300 bp bins, between replicates of EWS894 FAIRE done without nanodroplets (shown in lavender). Correlation coefficient,  $R$ , depicted. (C) Correlation of genome-wide FAIRE signal, in 300 bp bins, between replicates of EWS894 FAIRE done with nanodroplets (shown in dark purple). Correlation coefficient,  $R$ , depicted.
