# Supplementary material for: Genome-wide cancer-specific chromatin accessibility patterns derived from archival processed xenograft tumors
Source: PubMed Central journal article supplement — Genome Res. 2021 Dec;31(12):2327–39. doi: 10.1101/gr.275219.121 (PMC8647830; doi:10.1101/gr.275219.121), 2021-12
Supplement: supp_gr.275219.121_Supplemental_Fig_S2.pdf [file supp_gr.275219.121_Supplemental_Fig_S2.pdf]

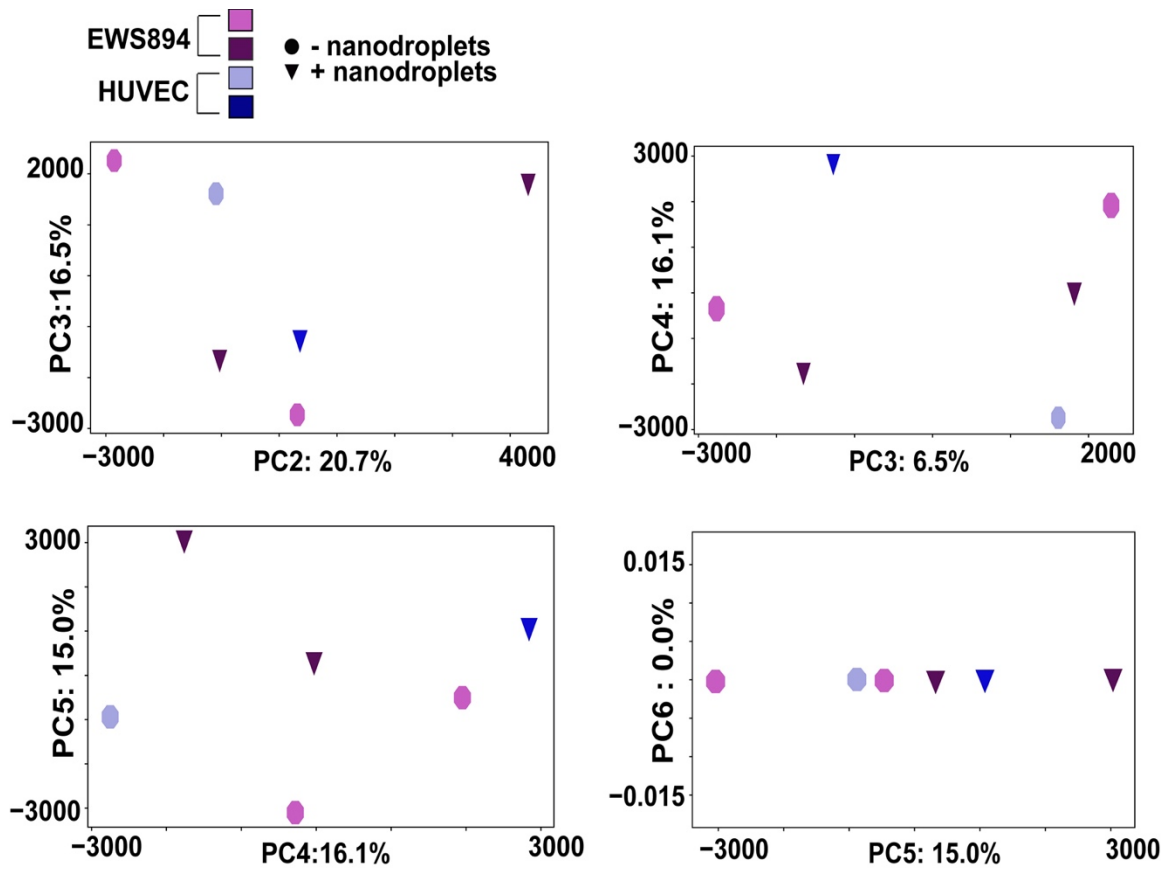

**Fig. S2. Principle component analysis of genome wide signal in EWS894 cell FAIRE with and without nanodroplets.** Principle components of PCA analysis of mean FAIRE-seq signal in 300 bp windows genome wide across EWS894 (purple) and HUVEC cell lines (blue) identified by traditional FAIRE and nanodroplet FAIRE. Each symbol represents a FAIRE-seq data replicate; circles denote signal identified by traditional FAIRE, inverted triangles by nanodroplet FAIRE. PCs 2 – 6 are shown complementary to components 1 and 2 shown in Figure 2B.
