# Supplementary material for: Genome-wide cancer-specific chromatin accessibility patterns derived from archival processed xenograft tumors
Source: PubMed Central journal article supplement — Genome Res. 2021 Dec;31(12):2327–39. doi: 10.1101/gr.275219.121 (PMC8647830; doi:10.1101/gr.275219.121), 2021-12
Supplement: supp_gr.275219.121_Supplemental_Fig_S3.pdf [file supp_gr.275219.121_Supplemental_Fig_S3.pdf]

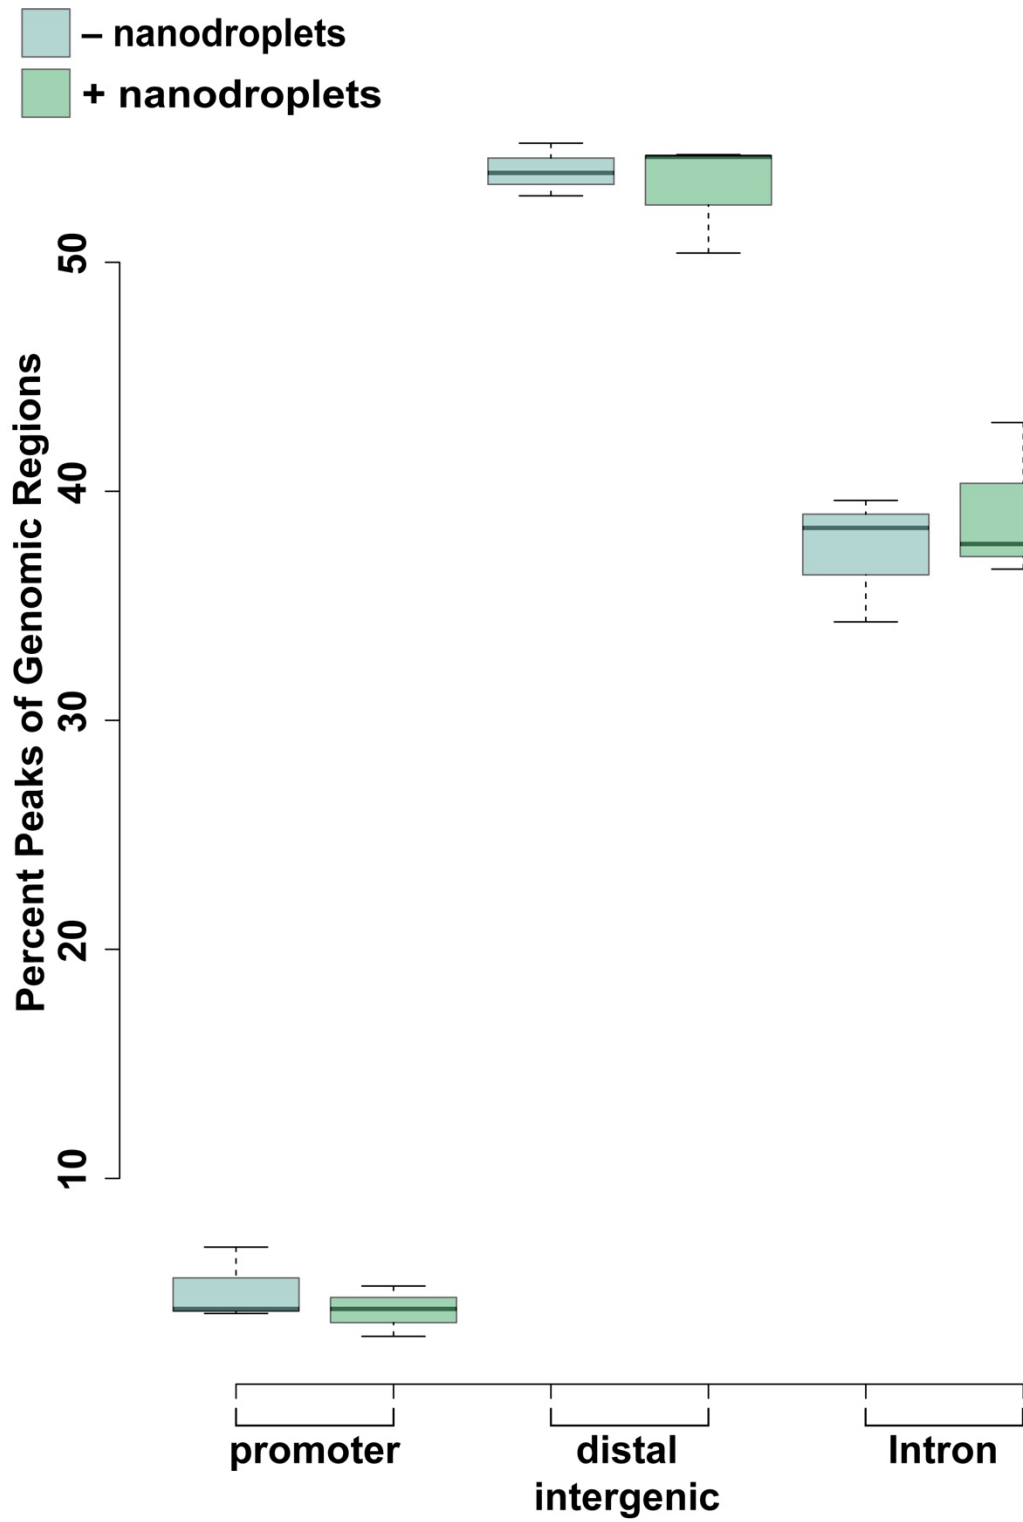

**Fig. S3. EWS894 cell FAIRE signal with and without nanodroplets at genomic regions.** Boxplots of EWS894 FAIRE signal at promoters, distal intergenic regions, and introns across replicates with (green) and without (blue) nanodroplets (2 replicates each).
