# Supplementary material for: Genome-wide cancer-specific chromatin accessibility patterns derived from archival processed xenograft tumors
Source: PubMed Central journal article supplement — Genome Res. 2021 Dec;31(12):2327–39. doi: 10.1101/gr.275219.121 (PMC8647830; doi:10.1101/gr.275219.121), 2021-12
Supplement: supp_gr.275219.121_Supplemental_Fig_S4.pdf [file supp_gr.275219.121_Supplemental_Fig_S4.pdf]

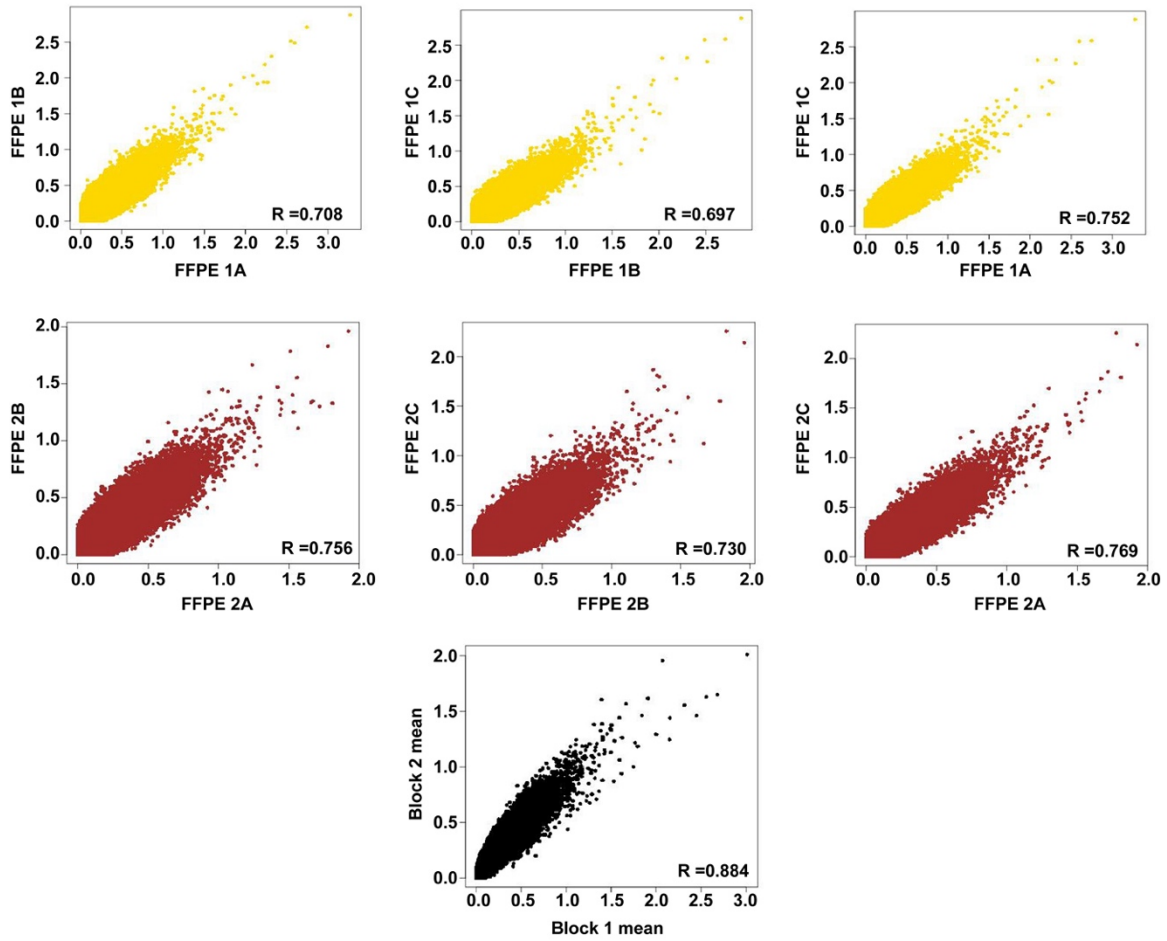

**Fig. S4. Correlation of FAIRE signal between EWS894 FFPE tissue replicates.** Correlation of genome-wide FAIRE signal, in 300 bp bins, among EWS894 FFPE FAIRE replicates ( $n = 3$ ) within each block (block 1 replicates, yellow; block 2 replicates, maroon). Correlation of genome wide signal between the two FFPE blocks also shown in black. Correlation coefficient,  $R$ , depicted for each comparison.
