# Supplementary material for: Genome-wide cancer-specific chromatin accessibility patterns derived from archival processed xenograft tumors
Source: PubMed Central journal article supplement — Genome Res. 2021 Dec;31(12):2327–39. doi: 10.1101/gr.275219.121 (PMC8647830; doi:10.1101/gr.275219.121), 2021-12
Supplement: supp_gr.275219.121_Supplemental_Fig_S8.pdf [file supp_gr.275219.121_Supplemental_Fig_S8.pdf]

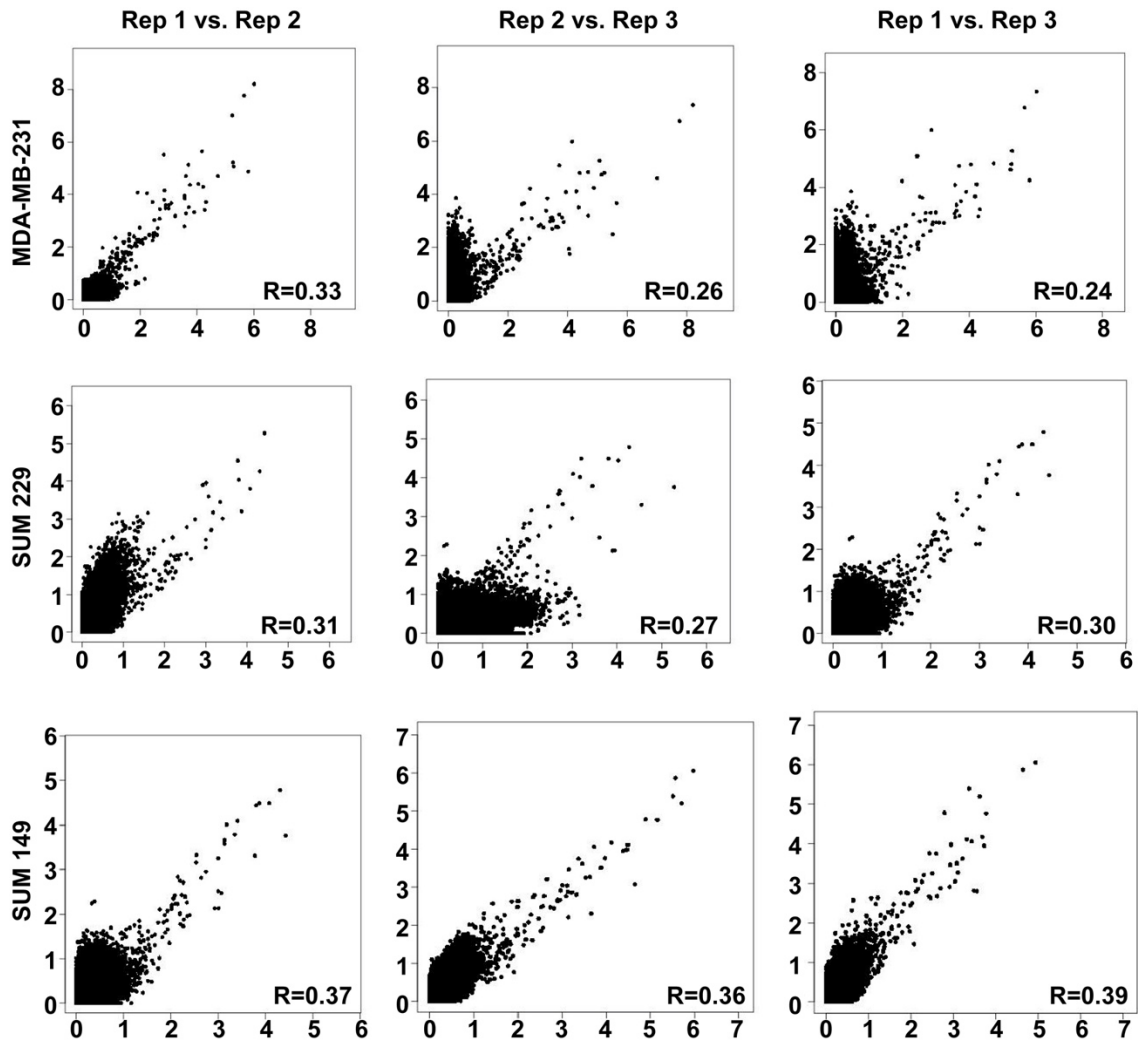

**Fig. S8. Correlation of genome wide signal in ER- breast carcinoma xenografts.** Correlation of mean signal in 300 bp bins genome-wide, with 100 bp shifts between replicates within each xenograft. Spearman's correlation coefficient for each replicate pair comparison shown.
