# Supplementary material for: Genome-wide cancer-specific chromatin accessibility patterns derived from archival processed xenograft tumors
Source: PubMed Central journal article supplement — Genome Res. 2021 Dec;31(12):2327–39. doi: 10.1101/gr.275219.121 (PMC8647830; doi:10.1101/gr.275219.121), 2021-12
Supplement: supp_gr.275219.121_Supplemental_Fig_S11.pdf [file supp_gr.275219.121_Supplemental_Fig_S11.pdf]

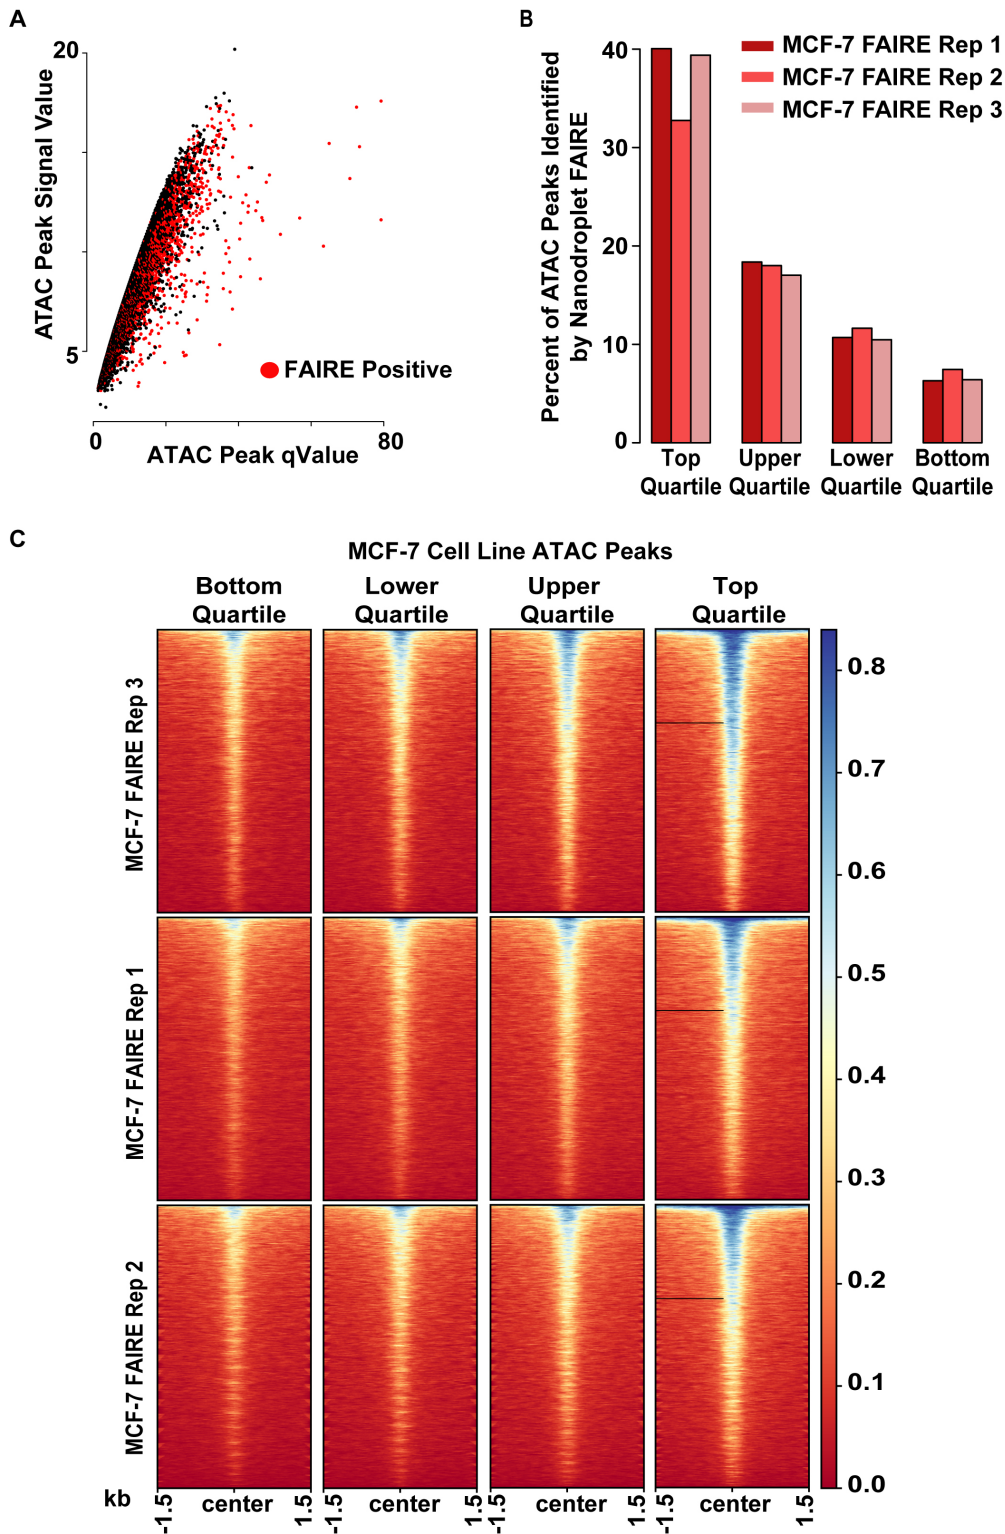

**Fig. S11.** Nanodroplet FAIRE-seq from MCF-7 FFPE tissue compared to ATAC-seq from an MCF-7 cell line. (A) Plot of regions of enrichment identified in MCF-7 ATAC. The significance (p-value), of each peak called is plotted against the mean ATAC signal value in that region. Points colored red were also called significant regions of enrichment by nanodroplet FAIRE-seq (FAIRE positive). (B) Percent of regions of enrichment identified in MCF-7 ATAC also called significant in each MCF-7 tissue nanodroplet FAIRE-seq replicate, per quartile. (C) Tornado plot of MCF-7 tissue FAIRE-seq enrichment per replicate at all MCF-7 cell ATAC peaks called, separated by quartile.
