# Supplementary material for: Genome-wide cancer-specific chromatin accessibility patterns derived from archival processed xenograft tumors
Source: PubMed Central journal article supplement — Genome Res. 2021 Dec;31(12):2327–39. doi: 10.1101/gr.275219.121 (PMC8647830; doi:10.1101/gr.275219.121), 2021-12
Supplement: supp_gr.275219.121_Supplemental_Table_S1.pdf [file supp_gr.275219.121_Supplemental_Table_S1.pdf]

**Table S1.** Average number of nuclei per 10-micron xenograft tissue section.

| Xenograft Tumor Type            | Sample ID              | Density Nucleus (# nuclei/mm <sup>2</sup> ) | # All Nucleus (5 $\mu$ m sections) | # All Nucleus (10 $\mu$ m sections*) | Average Nuclei per 10 $\mu$ m section (Top + Bottom)/2 |
|---------------------------------|------------------------|---------------------------------------------|------------------------------------|--------------------------------------|--------------------------------------------------------|
| Clear cell renal cell carcinoma | 786-0 (25) Top         | 4382.3                                      | 109303                             | 218606                               | 116812                                                 |
|                                 | 786-0 (25) Bottom      | 3987.4                                      | 7509                               | 15018                                |                                                        |
|                                 | 786-0 (27) Top         | 4262.9                                      | 11453                              | 22906                                | 62203                                                  |
|                                 | 786-0 (27) Bottom      | 4250.9                                      | 50750                              | 101500                               |                                                        |
|                                 | 786-0 (28) Top         | 3889.1                                      | 71217                              | 142434                               | 105647                                                 |
|                                 | 786-0 (28) Bottom      | 4005.1                                      | 34430                              | 68860                                |                                                        |
|                                 | UM-RC-2 (29) Top       | 2789.2                                      | 52441                              | 104882                               | 158112                                                 |
|                                 | UM-RC-2 (29) Bottom    | 3210.7                                      | 105671                             | 211342                               |                                                        |
|                                 | UM-RC-2 (30) Top       | 4385.7                                      | 27480                              | 54960                                | 86829                                                  |
|                                 | UM-RC-2 (30) Bottom    | 3402.4                                      | 59349                              | 118698                               |                                                        |
| UM-RC-2 (32) Top                | 3417.3                 | 66355                                       | 132710                             | 103136                               |                                                        |
| UM-RC-2 (32) Bottom             | 3315.9                 | 36781                                       | 73562                              |                                      |                                                        |
| Ewing sarcoma                   | A673 (45) Top          | 8257.7                                      | 353762                             | 707524                               | 786964                                                 |
|                                 | A673 (45) Bottom       | 7844.0                                      | 433202                             | 866404                               |                                                        |
|                                 | A673 (46) Top          | 6963.3                                      | 242565                             | 485130                               | 531592                                                 |
|                                 | A673 (46) Bottom       | 6989.7                                      | 289027                             | 578054                               |                                                        |
|                                 | A673 (48) Top          | 7920.4                                      | 350948                             | 701896                               | 787856                                                 |
|                                 | A673 (48) Bottom       | 7831.6                                      | 436908                             | 873816                               |                                                        |
|                                 | EWS894 (37) Top        | 8692.9                                      | 360242                             | 720484                               | 786880                                                 |
|                                 | EWS894 (37) Bottom     | 8409.0                                      | 426638                             | 853276                               |                                                        |
|                                 | EWS894 (40) Top        | 9182.9                                      | 563589                             | 1127178                              | 1266338                                                |
|                                 | EWS894 (40) Bottom     | 8301.3                                      | 702749                             | 1405498                              |                                                        |
|                                 | EWS894 (39) Top        | 8149.0                                      | 551542                             | 1103084                              | 968082                                                 |
|                                 | SK-NM-C (41) Top       | 7532.0                                      | 441583                             | 883166                               |                                                        |
|                                 | SK-NM-C (41) Bottom    | 7707.2                                      | 526499                             | 1052998                              | 944545                                                 |
|                                 | SK-NM-C (42) Top       | 8016.1                                      | 422012                             | 844024                               |                                                        |
| SK-NM-C (42) Bottom             | 7919.0                 | 522533                                      | 1045066                            | 788704                               |                                                        |
| SK-NM-C (44) Top                | 8508.1                 | 427209                                      | 854418                             |                                      |                                                        |
| SK-NM-C (44) Bottom             | 8646.4                 | 361495                                      | 722990                             |                                      |                                                        |
| Luminal breast carcinoma        | MCF7-6Hrs (1) Top      | 5552.4                                      | 200953                             | 401906                               | 321673                                                 |
|                                 | MCF7-6Hrs (1) Bottom   | 6067.4                                      | 120720                             | 241440                               |                                                        |
|                                 | MCF7-6Hrs (12) Top     | 6341.8                                      | 170402                             | 340804                               | 418828                                                 |
|                                 | MCF7-6Hrs (12) Bottom  | 5898.4                                      | 248426                             | 496852                               |                                                        |
|                                 | MCF7-6Hrs (2) Top      | 6024.7                                      | 90566                              | 181132                               | 283604                                                 |
|                                 | MCF7-6Hrs (2) Bottom   | 6612.0                                      | 193038                             | 386076                               |                                                        |
|                                 | MCF7-24Hrs (1) Top     | 6096.6                                      | 231256                             | 462512                               | 376988                                                 |
|                                 | MCF7-24Hrs (1) Bottom  | 5690.3                                      | 145732                             | 291464                               |                                                        |
|                                 | MCF7-24Hrs (12) Top    | 6626.4                                      | 154188                             | 308376                               | 427592                                                 |
|                                 | MCF7-24Hrs (12) Bottom | 6350.0                                      | 273404                             | 546808                               |                                                        |
|                                 | MCF7-24Hrs (2) Top     | 4308.0                                      | 39819                              | 79638                                | 103909                                                 |
|                                 | MCF7-24Hrs (2) Bottom  | 4243.6                                      | 64090                              | 128180                               |                                                        |
|                                 | MCF7-48Hrs (1) Top     | 4310.2                                      | 71086                              | 142172                               | 225830                                                 |
|                                 | MCF7-48Hrs (1) Bottom  | 4612.3                                      | 154744                             | 309488                               |                                                        |
|                                 | MCF7-48Hrs (11) Top    | 2334.4                                      | 48186                              | 96372                                | 76693                                                  |
|                                 | MCF7-48Hrs (11) Bottom | 1967.3                                      | 28507                              | 57014                                |                                                        |
|                                 | MCF7-48Hrs (2) Top     | 6116.8                                      | 84911                              | 169822                               | 271855                                                 |
|                                 | MCF7-48Hrs (2) Bottom  | 6061.1                                      | 186944                             | 373888                               |                                                        |
| ZR751 (9) Top                   | 6478.5                 | 227506                                      | 455012                             | 269086                               |                                                        |
| ZR751 (9) Bottom                | 5359.5                 | 41580                                       | 83160                              |                                      |                                                        |
| Basal breast carcinoma          | MDA-MB-231 (21) Top    | 3949.3                                      | 135443                             | 270886                               | 303357                                                 |
|                                 | MDA-MB-231 (21) Bottom | 4015.9                                      | 167914                             | 335828                               |                                                        |
|                                 | MDA-MB-231 (22) Top    | 3989.4                                      | 179866                             | 359732                               | 387247                                                 |
|                                 | MDA-MB-231 (22) Bottom | 4017.8                                      | 207381                             | 414762                               |                                                        |
|                                 | MDA-MB-231 (24) Top    | 4495.1                                      | 249289                             | 498578                               | 514913                                                 |
|                                 | MDA-MB-231 (24) Bottom | 4385.4                                      | 265624                             | 531248                               |                                                        |
|                                 | SUM149(13) Top         | 5775.1                                      | 267513                             | 535026                               | 567932                                                 |
|                                 | SUM149(13) Bottom      | 5786.4                                      | 300419                             | 600838                               |                                                        |
|                                 | SUM149(15) Top         | 7145.8                                      | 374722                             | 749444                               | 781460                                                 |
|                                 | SUM149(15) Bottom      | 7432.8                                      | 406738                             | 813476                               |                                                        |
|                                 | SUM149(16) Top         | 5337.3                                      | 322088                             | 644176                               | 728839                                                 |
|                                 | SUM149(16) Bottom      | 5909.2                                      | 406751                             | 813502                               |                                                        |
|                                 | SUM227 (17) Top        | 4687.2                                      | 238065                             | 476130                               | 505548                                                 |
|                                 | SUM227 (17) Bottom     | 4480.8                                      | 267483                             | 534966                               |                                                        |
|                                 | SUM227 (19) Top        | 4667.6                                      | 373807                             | 747614                               | 733204                                                 |
|                                 | SUM227 (19) Bottom     | 4332.7                                      | 359397                             | 718794                               |                                                        |
|                                 | SUM227 (20) Top        | 5091.3                                      | 297552                             | 595104                               | 550629                                                 |
|                                 | SUM227 (20) Bottom     | 4483.1                                      | 253077                             | 506154                               |                                                        |
