# Supplementary material for: Genome-wide cancer-specific chromatin accessibility patterns derived from archival processed xenograft tumors
Source: PubMed Central journal article supplement — Genome Res. 2021 Dec;31(12):2327–39. doi: 10.1101/gr.275219.121 (PMC8647830; doi:10.1101/gr.275219.121), 2021-12
Supplement: supp_gr.275219.121_Supplemental_Table_S2.pdf [file supp_gr.275219.121_Supplemental_Table_S2.pdf]

**Table S2.** Primers used for quantitative PCR.

| <b>Oligo Name</b> | <b>Forward Oligo Sequence</b> | <b>Reverse Oligo Sequence</b> |
|-------------------|-------------------------------|-------------------------------|
| Open 1            | GCACCTCCCTCTGCCGCTTC          | GCCCTCAAAGGGGCGGAACC          |
| Open 2            | TATACCCGCAGGTCCAGAATCGTT      | AATAGCTCTAGACGCTTCCGCCTT      |
| Open 3            | CGGGAGGCCAATCGAACGCC          | GCTGAACGTCGCTCCTGACCC         |
| Open 4            | GTGAGAGTGCAGGGCCCAAG          | GCCCGCCTTTCTCGCCGGTA          |
| Open 5            | TCACATGACCCGCCCAACCG          | CGACGGCGGAAGAGAACGCT          |
| Closed 1          | TTCTCCAACCTTTGGAAGCCCAGGA     | TGTCTCCTTCTAGGCCCTCACAAT      |
| Closed 2          | GTGGGAAGCTATGGCTGAGAAGCA      | TTGCCTTGGATTCCGTGCAGC         |
| Closed 3          | ACAGCCGGGGCAACTAGAAGA         | GACACCGCTTGGACCCGAGG          |
| Closed 4          | AGGTCAGCGTCAAAGAGGGGCT        | ACCTGACGCATGAAGGGCAGC         |
| Closed 5          | AGAGCCAAACCCAAGGAGGTA ACTA    | GCCCACATGCATGCAATCCCA         |
